# Supplementary material for: Neuroprotective effects of dynamic bubble trap use in patients undergoing pulmonary endarterectomy: a two-arm randomized controlled trial
Source: PubMed Central journal article supplement — J Thorac Dis. 2021 Oct;13(10):5807–17. doi: 10.21037/jtd-21-831 (PMC8575830; doi:10.21037/jtd-21-831), 2021-10
Supplement: jtd-13-10-5807-dss.pdf [file jtd-13-10-5807-dss.pdf]

## Data Sharing Statement

|                     |                                                                                                                                                    |                                                                                                                   |
|---------------------|----------------------------------------------------------------------------------------------------------------------------------------------------|-------------------------------------------------------------------------------------------------------------------|
| <b>Article Info</b> | <a href="https://dx.doi.org/10.21037/jtd-21-831">https://dx.doi.org/10.21037/jtd-21-831</a>                                                        |                                                                                                                   |
| <b>Item</b>         | <b>Question</b>                                                                                                                                    | <b>Authors' Response<br/>(place "-" if not applicable)</b>                                                        |
| 1                   | Would you like to share data collected for your study to others?                                                                                   | No.                                                                                                               |
| 2                   | If not, would you like to share the reason for your decision?                                                                                      | In principle, data sharing is welcome. However, we would prefer the way of an individual request (e.g. by email). |
| 3                   | What data in particular will be shared?                                                                                                            | -                                                                                                                 |
| 4                   | Any other documents will be share? Such as study protocol, statistical analysis plan, informed consent form, clinical study report, analytic code. | -                                                                                                                 |
| 5                   | When will data availability begin?                                                                                                                 | -                                                                                                                 |
| 6                   | When will data availability end?                                                                                                                   | -                                                                                                                 |
| 7                   | To whom will you share the data?                                                                                                                   | -                                                                                                                 |
| 8                   | For what type of analysis or purpose?                                                                                                              | -                                                                                                                 |
| 9                   | How or where can the data/documents be obtained?                                                                                                   | -                                                                                                                 |
| 10                  | Any other restrictions?                                                                                                                            | -                                                                                                                 |
