# Supplementary material for: Neuroprotective effects of dynamic bubble trap use in patients undergoing pulmonary endarterectomy: a two-arm randomized controlled trial
Source: PubMed Central journal article supplement — J Thorac Dis. 2021 Oct;13(10):5807–17. doi: 10.21037/jtd-21-831 (PMC8575830; doi:10.21037/jtd-21-831), 2021-10
Supplement: jtd-13-10-5807-tp.pdf [file jtd-13-10-5807-tp.pdf]

# **N.E.O.C.A.R.E.**

## ***Projektbeschreibung***

### **1. Allgemeine Angaben**

#### **1.1. Projekttitlel**

Reduction of cerebral air microembolisation improves **NEuropsychological OutCome** After pulmonaRy **E**ndarterectomy (**N.E.O.C.A.R.E. Study**)

#### **1.2. Persönliche Daten der Antragsteller**

Antragsteller ist die "Heart & Brain Research Group".

Die "Heart & Brain Research Group" ist ein Kooperationsprojekt zwischen dem Universitätsklinikum Giessen - Klinik für Neurologie - und der Kerckhoff Klinik Bad Nauheim, vertreten durch die Antragsteller.

#### **1.3. Zeitplan**

- Beginn nach positivem Votum der Ethikkommission der JL Universität Giessen
- Rekrutierungsphase: Monat 1 bis 15
- Untersuchungsphase (einschließlich Nachuntersuchung nach drei Monaten): Monat 1 bis 18
- Auswertungsphase: Monat 18 bis 21
- Gesamtdauer: 21 Monate

#### **1.4. Information über die antragstellenden Institutionen**

Rechtsform

- Kerckhoff-Klinik: gemeinnützige Gesellschaft mit beschränkter Haftung
- Justus-Liebig-Universität Gießen: Körperschaft des öffentlichen Rechts

### **2. Darstellung des Vorhabens**

#### **2.1. Neuroprotektion während pulmonaler Endarteriektomie (PEA)**

Während chirurgischer Eingriffe unter Verwendung der extrakorporalen Zirkulation (ECC) treten eine Vielzahl neurologischer Komplikationen auf. Wissenschaftliche Untersuchungen beziehen sich dabei vorwiegend auf kardiochirurgische Eingriffe. Während schwere neurologische Komplikationen wie Hirninfarkte oder globale Ischämien unter Anwendung der ECC selten geworden sind, stellen kognitive Störungen weiterhin ein ungelöstes Problem dar. Zwischen einem und zwei Drittel der Patienten weisen kognitive Defizite auf, die noch Monate und Jahre nach der Operation nachweisbar sind [1] und häufig

als Beeinträchtigung der Lebensqualität wahrgenommen werden, aber auch Alltagsrelevanz besitzen, sich z.B. in schlechterem Fahrverhalten äußern [2].

Verantwortlich für diese Komplikationen werden intraoperativ detektierbare zerebrale Mikroembolien (MES) gemacht. Potentielle Emboliequellen stellen rupturierte atherosklerotische Plaques sowie Gasblasen dar, die z.B. durch den Oxygenator der Herz-Lungen-Maschine (HLM), durch Injektionen und Blutabnahmen verursacht werden. Aber auch Manipulationen wie das Eröffnen des Herzens, das Legen und Entfernen von Kanülen und die AbklemmprozEDUREN an der Aorta kommen hierbei in Frage [3]. Die Mehrzahl der Mikroembolien während Herzoperationen an der HLM besteht vermutlich aus Luft [4].

Über das Auftreten zerebraler Mikroembolien während Pulmonaler Endarteriektomie (PEA), also dem operativen Ausschälen der Lungenarterie bei Patienten mit chronisch thromboembolischer pulmonale Hypertonie (CTEPH) unter Verwendung der extrakorporalen Zirkulation, gibt es bisher keine Studien. Man kann davon ausgehen, dass bei Operationszeiten von durchschnittlich 6,5 Stunden und Perfusionszeiten an der HLM von 4 bis 5 Stunden, die Belastung an Gasembolien für die Patienten relevant ist. Das Risiko einer atherosklerotisch bedingten Plaqueruptur während der PEA ist geringer einzuschätzen als bei herzchirurgischen Eingriffen, da Patienten mit CTEPH kaum von Atherosklerose betroffen sind. Während der PEA werden im Regelfall keine Herzhöhlen eröffnet, so daß diese Emboliequelle der systemarteriellen Zirkulation ebenfalls ausscheidet. Somit ist die Hypothese, dass postoperativ neuropsychologische Defizite vorwiegend durch gasförmige Mikroembolien aus der HLM verursacht werden.

In einer in der Kerckhoff-Klinik durchgeführten, groß angelegten Studie (Microembolization during Extracorporeal Circulation, MEDEX) an Patienten, die sich einer koronaren Bypass-Operation unterzogen haben, wurde gezeigt, dass der intraoperative Einsatz von Filtersystemen Einfluss auf postoperative kognitive Defizite hat. So führt der Einsatz einer dynamischen Gasbläschenfalle (dynamic bubble trap, DBT) im arteriellen Schenkel der Herz-Lungenmaschine, drei Monate nach dem Eingriff zu einer signifikanten Besserung der kognitiven Leistungen sowie zu einer signifikanten Reduktion der intraoperativen Embolisationsrate. Ein Filter zur Reduktion solider Partikel (EMBOL-X) besserte hingegen postoperativ nicht die neuropsychologischen Defizite [5].

Mit dem vorliegenden Forschungsvorhaben soll in einem weiteren Einsatzgebiet der neuroprotektive Nutzen intraoperativ angewandter Filtersysteme evaluiert werden. Trotz fehlender Vorstudien ist bei Patienten mit PEA aufgrund langer Perfusionszeiten an der HLM mit einer erhöhten Rate von Gasembolien zu rechnen. Daher sollten Patienten während einer PEA in besonderer Weise von einem Filtersystem profitieren, dass einen Großteil der Gasembolien aus dem arteriellen Kreislauf eliminiert.

### **3.     Arbeitsplan**

#### **3.1.   Ziele**

Wesentliches Ziel des hier beantragten Forschungsvorhabens ist die Erhebung des allgemeinen zerebralen Risikos von PEA-Operationen: dazu gehört die Ermittlung frischer ischämischer Hirnläsionen durch sensitive MRT-Verfahren ebenso, wie die Bestimmung etablierter (NSE, S100b) und

experimenteller (GFAP) Neurodestruktionsparameter sowie Veränderungen der kognitiven Leistungsfähigkeit mittels neuropsychologischer Testbatterie. Darüber hinaus soll die neuroprotektive Wirksamkeit der dynamischen Gasbläschenfalle (dynamic bubble trap, DBT), deren Einsatz sich bisher auf herzchirurgische Operationen mit HLM beschränkte, bei PEA-Operationen getestet werden.

### **3.2. Studiendesign**

#### Durchführung

Die geplante Studie wird monozentrisch an der Kerckhoff-Klinik Bad Nauheim durchgeführt.

Geplant ist die Randomisierung von 100 Patienten in zwei Gruppen:

- Gruppe 1: Kontrollgruppe – kein zusätzliches Filtersystem ( $n = 50$ )
- Gruppe 2: DBT-Gruppe – zusätzlicher Einsatz der dynamischen Gasbläschenfalle ( $n = 50$ )

#### Ein- und Ausschlusskriterien

##### Einschlusskriterien

- Patienten über 18 Jahren
- Elektive Pulmonale Endarteriektomie
- Informed Consent einschließlich der Bereitschaft zur MRT-Untersuchung und zur neuropsychologischen Testung nach 3 Monaten
- Deutsch als Muttersprache (da eine neuropsychologische Testung sprachabhängig ist)

##### Ausschlusskriterien

- Vorbestehende neurologische oder psychiatrische Erkrankung (insbesondere Z.n. Hirninfarkt, Schädel-Hirn-Trauma, manifeste Depression oder Demenz), die die neuropsychologische Testung beeinträchtigen könnten
- Kontraindikationen einer MRT-Untersuchung (z.B. Herzschrittmacherträger, Vena cava - Filter, Klaustrophobie)

#### Studienablauf

##### Präoperative Phase

- Screening und Aufklärung während der Diagnostik und Evaluation zur PEA oder spätestens 1-2 Tage vor geplantem Eingriff
- Neuropsychologische Testung
  - Syndromkurztest (Subtests zum visuellen Gedächtnis und Buchstaben-Interferenz-Aufgabe, erhebt Aufmerksamkeit und mentale Kontrolle)
  - Zahlen ausstreichen (selektive Aufmerksamkeit)
  - Zahlen-Symbol-Test (Konzentration)
  - Regensburger Wortflüssigkeitstest (sprachlich exekutive Funktion, divergentes Denken)
  - Verbaler Lern- und Merkfähigkeitstest
  - Nonverbaler Lerntest
  - Hospital Anxiety and Depression Scale, dt. Version

- Selbst- und Fremdeinschätzung der Kognition (Fragebogen)

#### Perioperative/ stationäre Phase

- Präoperative Blutentnahme (Bestimmung von NSE, S100b und experimenteller GFAP)
- Operation
- Intraoperativ: Sonographische Detektion der Anzahl von Mikroemboliesignalen im arteriellen Schenkel der Herz-Lungenmaschine
- 2. Tag: Postoperative Blutentnahme
- 5. bis 7. Tag: Postoperative MRT-Untersuchung
  - T2-Wichtung
  - Diffusionswichtung
  - Intra- und extrakranielle MR-Angiographie der hirnersorgenden Arterien

#### Postoperative Phase

- 3 Monate (+/- 2 Wochen): Neuropsychologische Testung (wie oben beschrieben)

### Hypothesen

#### Hauptfragestellung/ primärer Endpunkt

- Wird das neuropsychologische Outcome 3 Monate postoperativ durch die DBT beeinflusst?

Die neuropsychologischen Testwerte jedes Funktionsbereichs werden in z-Werte transformiert, wobei die Ergebnisse so gepolt werden, dass höhere z-Werte stets *bessere* Testleistungen repräsentieren.

Konkret soll folgende gerichtete Hypothese überprüft werden:

$H_0$ : Die postoperativen z-Werte der Interventionsgruppe DBT liegen kleiner/gleich als die postoperativen z-Werte der Kontrollgruppe.

$H_1$ : Die postoperativen z-Werte der Interventionsgruppe DBT liegen größer als die postoperativen z-Werte der Kontrollgruppe.

#### Weitere Fragestellungen/ sekundäre Endpunkte

- Wird die Anzahl, Größe und Verteilung der in der diffusionsgewichteten MRT sichtbaren Mikroinfarkte durch die DBT beeinflusst?
- Wird der Verlauf der Neurodestruktionsmarker NSE, S100b und GFAP durch die DBT beeinflusst?
- Beeinflusst die DBT aufgrund der langen Perfusionszeiten den Grad der Hämolyse?

### 3.3. Statistische Auswertung

Der primäre Endpunkt wird durch die Methode der geplanten Kontraste untersucht. In ein allgemeines lineares Modell werden die postoperativ erhobenen Werte der neuropsychologischen Untersuchung als abhängige Variable, die präinterventionellen Werte als stetige Kovariate und die zweistufige

Gruppenvariable als fester Intersubjektfaktor eingefügt. Überprüft werden die Intersubjektunterschiede als Kontrasteffekte zwischen der Interventionsgruppe DBT gegen den Kontrollarm. Nach den Richtlinien der Deutschen Gesellschaft für Psychologie [7] sind bei gerichteten Hypothesen geplante Kontraste einem globalen  $F$ -Test mit Posthoc-Verfahren vorzuziehen. Einer möglichen Kumulierung des Typ I-Fehlers wird durch eine  $\alpha$ -Fehlerkorrektur entgegengewirkt. Als Effektgrößen werden die standardisierten Mittelwertabstände  $d$  gewählt. Die Voraussetzung der Normalverteilung wird durch den Kolmogorov-Smirnov-Test überprüft. Varianzhomogenität wird durch den Levene-Test überprüft. Sollten die Voraussetzungen für eine parametrische Statistik nicht erfüllt sein, wird alternativ eine verteilungsannahmefreie Kovarianzanalyse nach dem Quade-Modell mit rangtransformierten Variablen durchgeführt.

Die Auswertung weiterer Fragestellungen erfolgt im Sinne der explorativen Datenanalyse. Gruppenunterschiede werden je nach Skalenniveau mit dem  $t$ -Test für unabhängige Stichproben bzw. dem U-Test erhoben. Tafeln mit diskreten Merkmalen werden mit dem  $\chi^2$ -Test analysiert.

Zusammenhangsmaße bei diskreten Variablen stellen die Kontingenzkoeffizienten dar. Bei stetigen Merkmalen werden je nach Datenniveau Zusammenhangsmaße nach Pearson (Produkt-Moment-Korrelation) oder nach Spearman (Rangkorrelation), in Ausnahmefällen auch nach Kendall (Rangkorrelation ohne Äquidistanzannahme) verwendet.

Das globale Signifikanzniveau wird auf  $\alpha = .05$  festgelegt. Zur  $\alpha$ -Fehlerkorrektur bei Mehrfachvergleichen wird eine *False Discovery Rate* (FDR) berechnet [6]. In der schrittweisen Prozedur werden die  $p$ -Werte nach absteigender Reihenfolge geordnet; die Nullhypothese wird verworfen, wenn:

$$p_{(i)} \leq \frac{i}{m} \alpha \quad (1),$$

wobei  $m$  die Anzahl der  $p$ -Werte und  $i$  der Rang des  $p$ -Werts repräsentieren. Unter der Voraussetzung von  $i = 1$  entspricht die FDR der Bonferroni-Korrektur.

### Fallzahlschätzung

Aus den bisherigen eigenen Studienergebnissen (Voruntersuchungen, MEDEX-Studie) ist hinsichtlich der primären Endpunkte gerechtfertigt von gerichteten Hypothesen auszugehen, die bei mittleren bis starken Effektgrößen nachzuweisen sind. Bei einer 80% *Power* auf einem einseitigen Signifikanzniveau von  $\alpha = .05$  und einer mittleren Effektstärke  $d = 0.6$  ergibt sich eine optimale Stichprobengröße von 37 Probanden pro Gruppe. Da mit einer *Dropout*-Rate von etwa 20% bezüglich der sechsmonatigen Nachuntersuchung in klinischen Studien zu rechnen ist, sollten 50 Patienten je Gruppe eingeschlossen werden.

## 4. Literaturverzeichnis

1. Newman MF, Kirchner JL, Phillips-Bute B, Gaver V, Grocott H, Jones RH, Mark DB, Reves JG, Blumenthal JA: **Longitudinal assessment of neurocognitive function after coronary-artery bypass surgery.** *N Engl J Med* 2001, **344**(6):395-402.
2. Ahlgren E, Lundqvist A, Nordlund A, Aren C, Rutberg H: **Neurocognitive impairment and driving performance after coronary artery bypass surgery.** *Eur J Cardiothorac Surg* 2003, **23**(3):334-340.
3. Borger MA, Feindel CM: **Cerebral emboli during cardiopulmonary bypass: effect of perfusionist interventions and aortic cannulas.** *J Extra Corpor Technol* 2002, **34**(1):29-33.
4. Schoenburg M, Kraus B, Muehling A, Taborski U, Hofmann H, Erhardt G, Hein S, Roth M, Vogt PR, Karliczek GF *et al*: **The dynamic air bubble trap reduces cerebral microembolism during cardiopulmonary bypass.** *J Thorac Cardiovasc Surg* 2003, **126**(5):1455-1460.
5. Gerriets T, Schwarz N, Sammer G, Baehr J, Stolz E, Kaps M, Kloevekorn WP, Bachmann G, Schonburg M: **Protecting the brain from gaseous and solid micro-emboli during coronary artery bypass grafting: a randomized controlled trial.** *Eur Heart J* 2010, **31**(3):360-368.
6. Benjamini Y, Hochberg Y: **Controlling the false discovery rate: a practical and powerful approach to multiple testing.** *J R Statist Soc* 1995, **57**(1):289-300.
7. Deutsche Gesellschaft für Psychologie, D. (2007). **Richtlinien zur Manuskriptgestaltung.** Göttingen, Bern, Wien, Paris, Oxford, Prag: Hogrefe.

Article information: <https://dx.doi.org/10.21037/jtd-21-831>
